# Supplementary material for: Gold nanoparticle–mesoporous silica sheet composites with enhanced antibody adsorption capacity
Source: Royal Society of Chemistry journal article supplement (doi:10.1039/c5nj00033e), 2015-01-01
Supplement: c5nj00033e1.pdf [file c5nj00033e1.pdf]

1 **SUPPORTING INFORMATION**

2

3 **Gold nanoparticle-mesoporous silica sheet composite with**  
4 **enhanced antibody adsorption capacity**

5

6 Kazuma Nakanishi,<sup>a,b</sup> Masahiro Tomita,<sup>a</sup> Yoshitake Masuda<sup>b</sup> and Katsuya Kato<sup>b\*</sup>

7 <sup>a</sup>Department of Chemistry for Materials, Graduate School of Engineering, Mie  
8 University, 1577 Kurimamachiya-cho, Tsu, Mie 514-8570, Japan. E-mail:kazuma-  
9 nakanishi@aist.go.jp; Fax: +81 59 231 9430; Tel: +81 59 231 9428

10 <sup>b</sup>National Institute of Advanced Industrial Science and Technology, 2266-78,  
11 Anagahora, Moriyamaku, Nagoya, Aichi 463-8560, Japan. E-mail: katsuya-  
12 kato@aist.go.jp; Fax: +81 52 736 7405; Tel: +81 52 736 7551

13 \*Corresponding author: K. Kato; E-mail: [katsuya-kato@aist.go.jp](mailto:katsuya-kato@aist.go.jp)

14

15

16

17

18

19

20

21

22

23

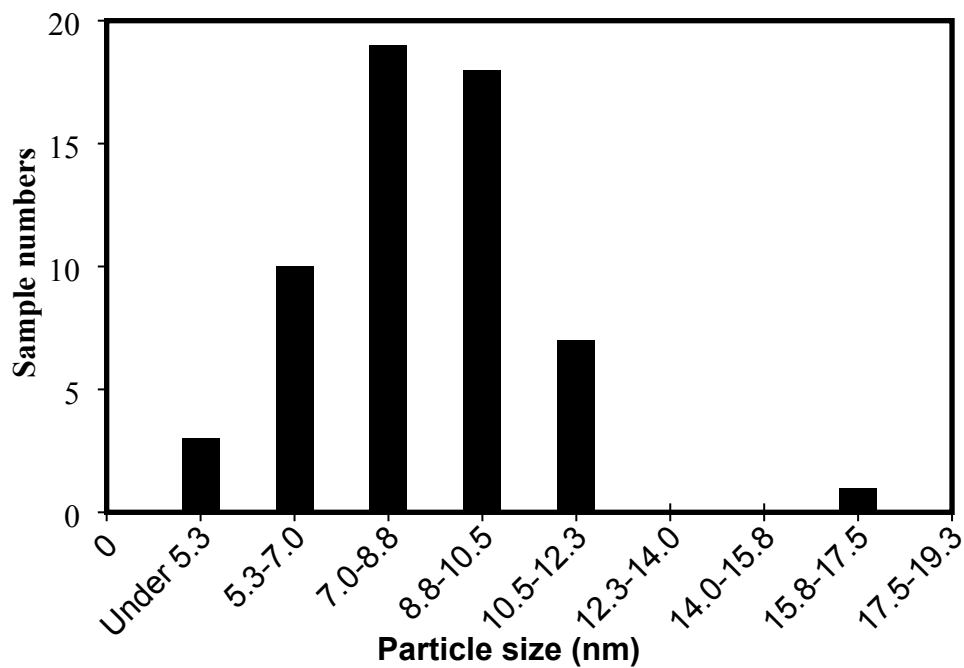

1

2 **Fig. S1** Au particle size distributions for sheet-Au-550.

3

4

5

6

7

8

9

10

11

12

13

1

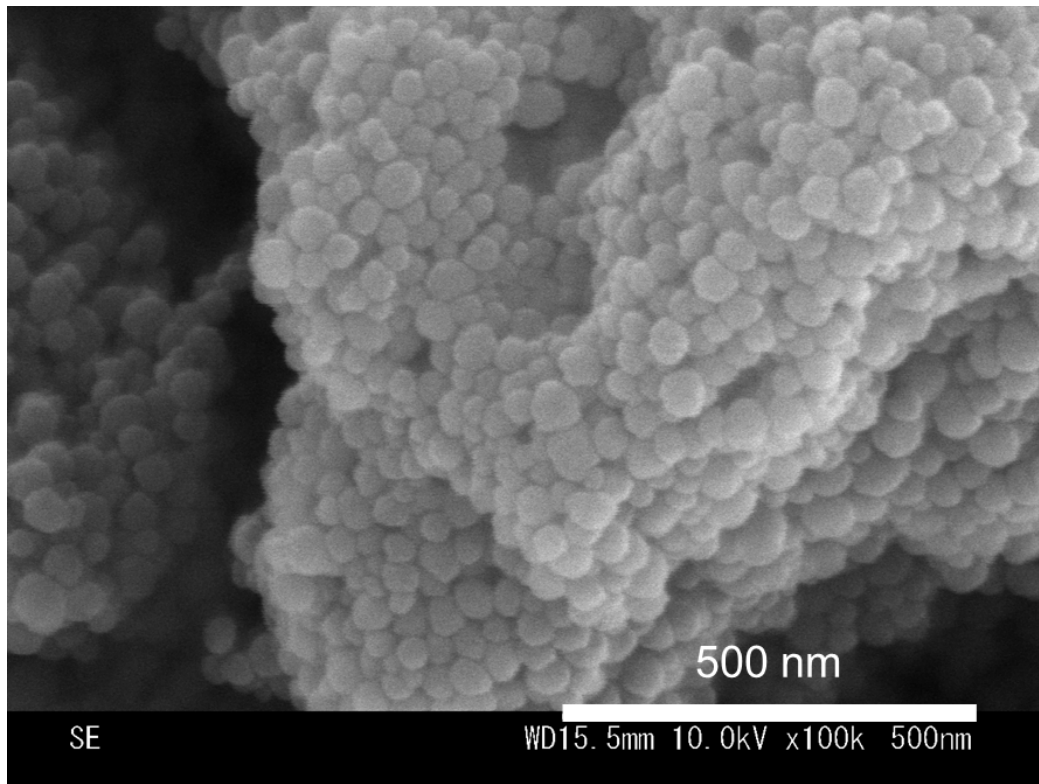

2

3

4 **Fig. S2** FE-SEM image of silica beads prepared using the Stober method.

5

6

7

8

9

10

11

12

1

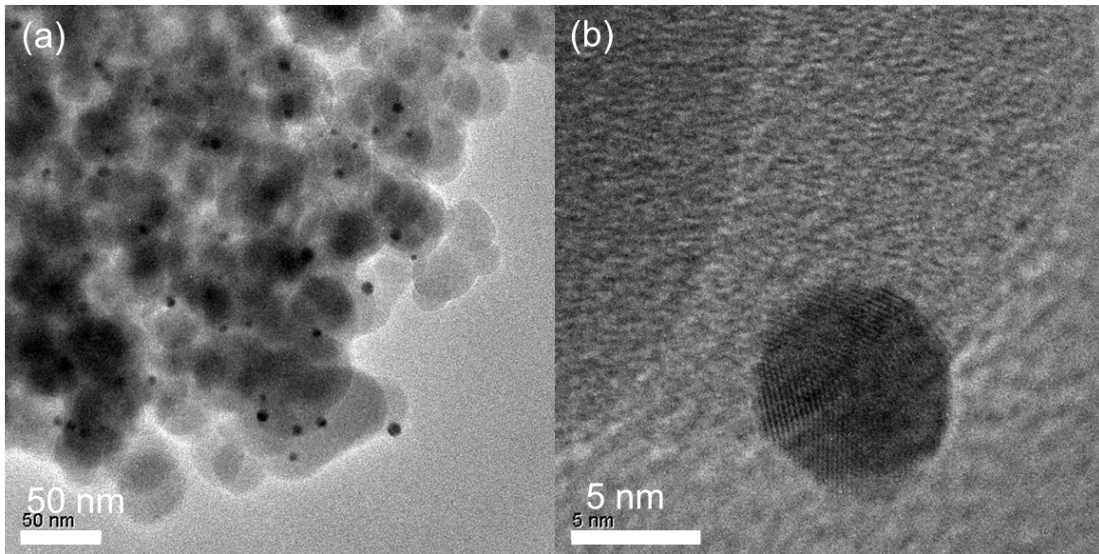

2

3

4 **Fig. S3** TEM images of Stöber-Au-550 (a)  $\times 50$  k and (b)  $\times 800$  k.

5

6

7

8

9

10

11

12

13

14

15

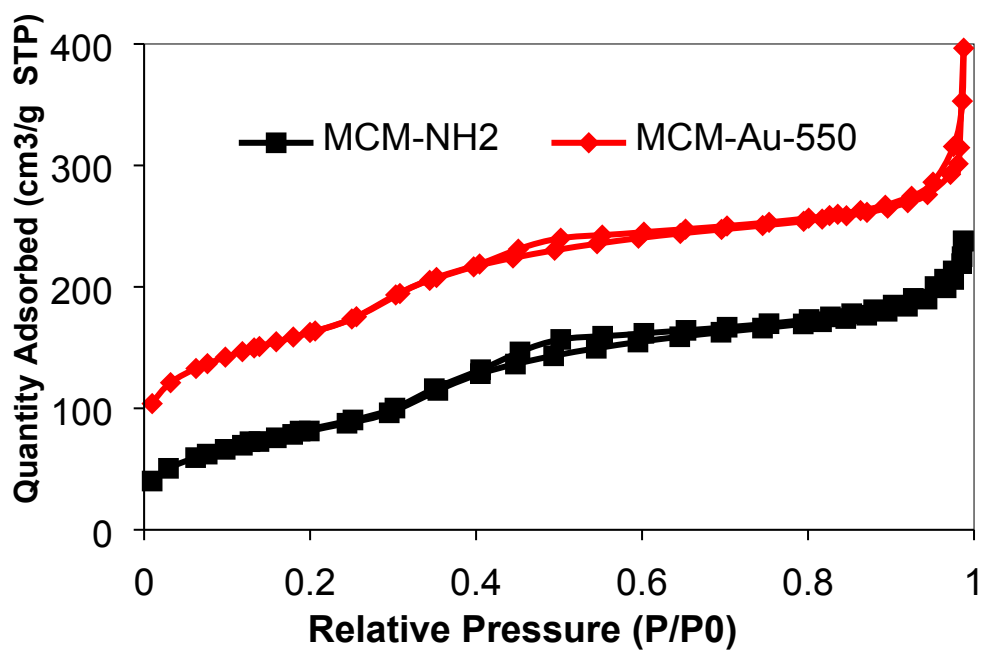

1

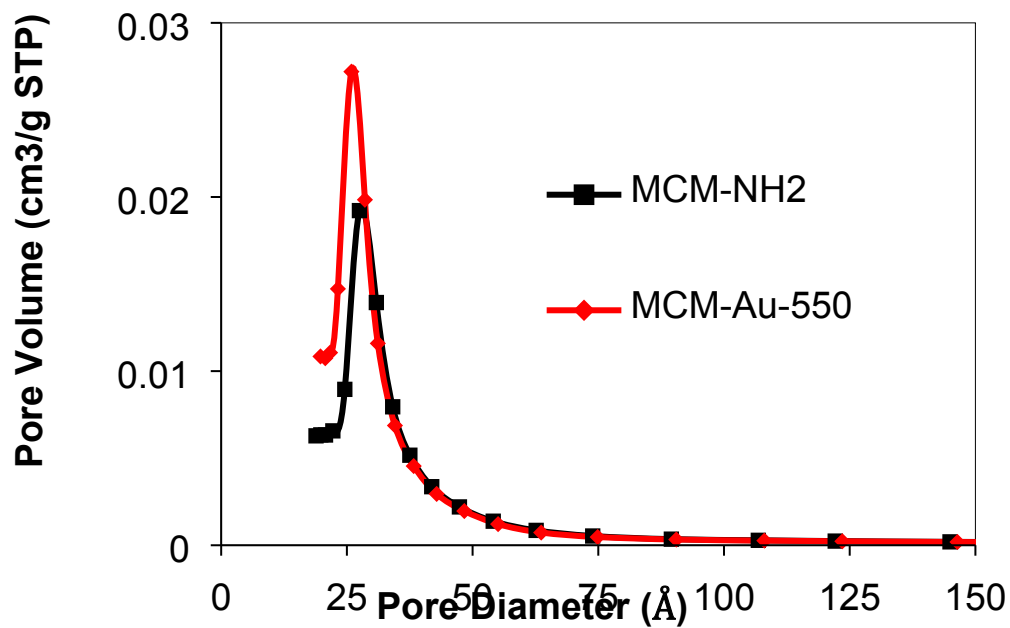

2

3 **Fig. S4** Nitrogen adsorption–desorption isotherms and pore distributions for MCM-NH<sub>2</sub>

4 (black) and MCM-Au-550 (red).

5

6

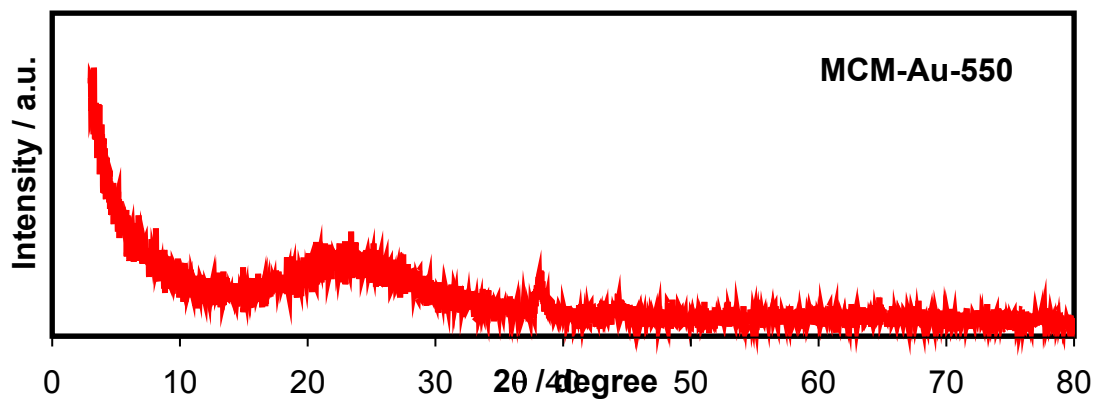

1

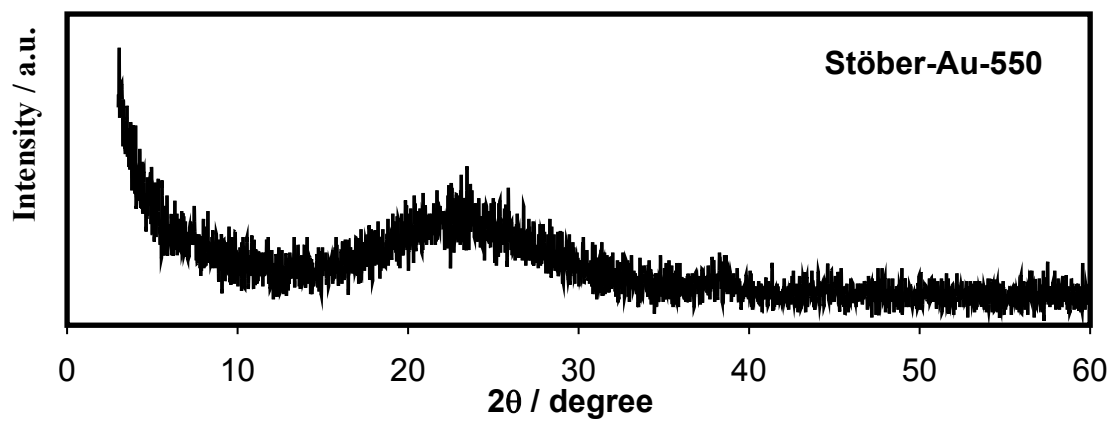

2

3 **Fig. S5** XRD patterns for MCM-Au-550 and Stöber-Au-550.

4

5

6

7

8

9

10

11

1 (a)

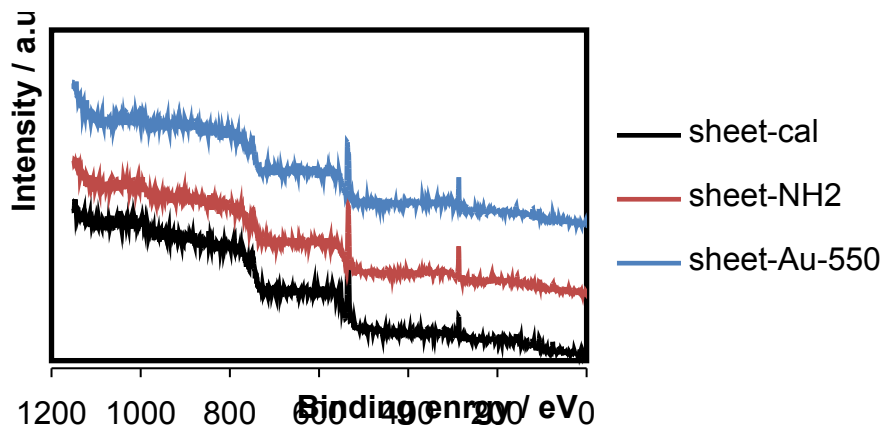

2 (b)

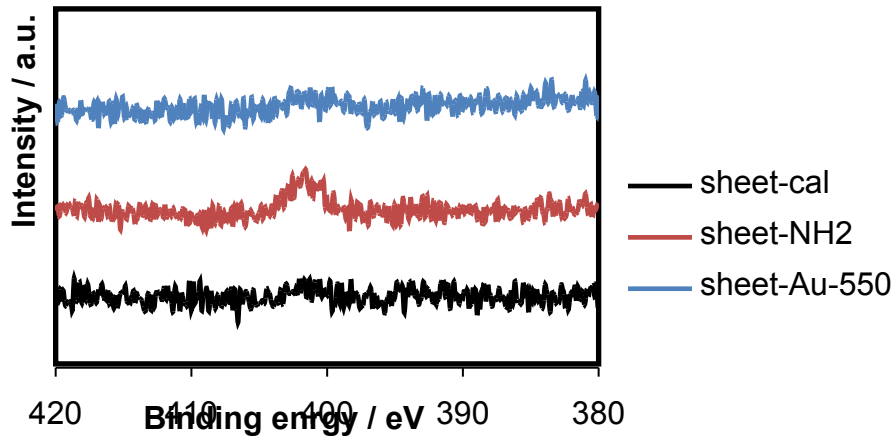

3

4 (c)

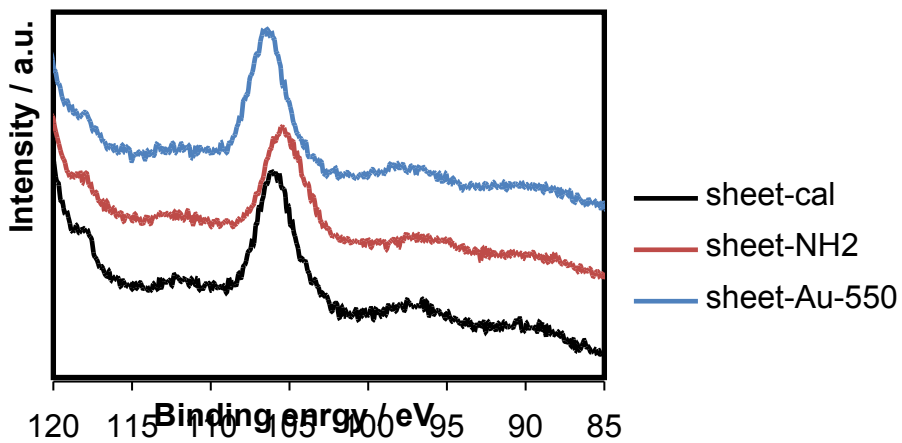

5

6 **Fig. S6** XPS spectra of the silica samples: (a) wide range, (b) N 1s and (c) Si 2p.

7

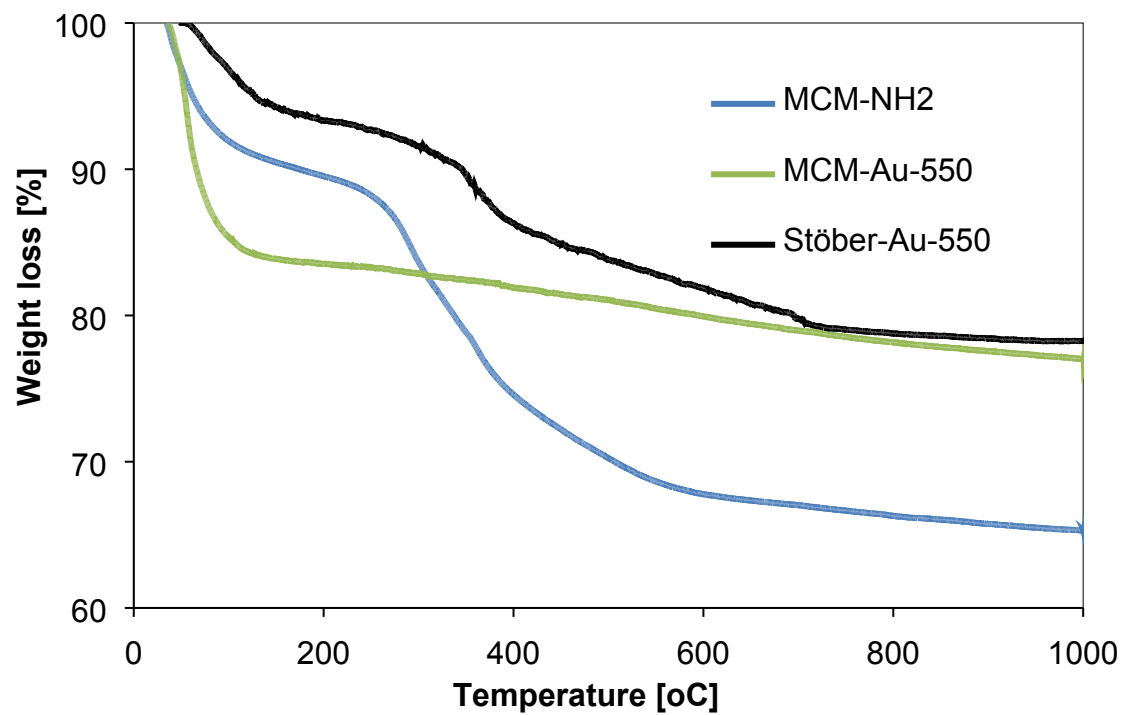

1

2 **Fig. S7** Thermogravimetry (TG) curves for MCM-NH<sub>2</sub> (blue), MCM-Au-550 (green)  
3 and Stöber-Au-550 (black).

4

5

6

7

8

9

10

11

12

13



1 **TableS1** Quantity of adsorbed IgG on various silica materials.

| Materials                      | sheet-cal | sheet-NH <sub>2</sub> | sheet-Au-550 | MCM-NH <sub>2</sub> | MCM-Au-550 | Stöber-NH <sub>2</sub> | Stöber-Au-550 |
|--------------------------------|-----------|-----------------------|--------------|---------------------|------------|------------------------|---------------|
| Amount of adsorbed IgG [mg/mg] | 0.21      | 0.15                  | 0.26         | 0.04                | 0.13       | 0.10                   | 0.14          |

2

3 0.5 mg of IgG/800 mL of 10 mM Phosphate Buffer (pH7.0) @ 1.5 mg of carrier

4 Adsorption reaction time = 3 h

5 Absorbance = 595 nm (1 s) (Using the Bradford method)

6
